# Supplementary material
Source: MDPI journal article supplement (https://www.mdpi.com/2071-1050/10/3/878)
Supplement: s1 [file s1]

# Supplementary File S3: Indicator exclusion justifications

This supplementary file provides concise reasons for every GRI G4 indicator excluded from the proposed framework.

## A.1. Economic indicators

| Indicator ID                                                                                                                                                                                                                                                | Indicator Name        | Measured impact      |
|-------------------------------------------------------------------------------------------------------------------------------------------------------------------------------------------------------------------------------------------------------------|-----------------------|----------------------|
| G4-EC3                                                                                                                                                                                                                                                      | Benefit plan coverage | Economic performance |
| <b>Indicator not generalisable:</b><br>Within the scope of the present study, organisational benefit plan coverage cannot be generalised for an entire industry as specific organisations offer different benefit plans and manage these in different ways. |                       |                      |

| Indicator ID                                                                                                                                                                                                                                                                 | Indicator Name                                  | Measured impact |
|------------------------------------------------------------------------------------------------------------------------------------------------------------------------------------------------------------------------------------------------------------------------------|-------------------------------------------------|-----------------|
| G4-EC5                                                                                                                                                                                                                                                                       | Ratio of entry level wage to local minimum wage | Market presence |
| <b>Indicator not generalisable:</b><br>Due to different business models, -strategies and -management styles, the entry level wage paid to employees by organisations can vary widely within an industry and cannot be generalised with reasonable certainty for an industry. |                                                 |                 |

| Indicator ID                                                                                                                                                                                                                                                               | Indicator Name                                                 | Measured impact |
|----------------------------------------------------------------------------------------------------------------------------------------------------------------------------------------------------------------------------------------------------------------------------|----------------------------------------------------------------|-----------------|
| G4-EC6                                                                                                                                                                                                                                                                     | Proportion of senior management hired from the local community | Market presence |
| <b>Indicator not generalisable:</b><br>Due to different business models, -strategies and -management styles, the composition of senior management of organisations can vary widely within an industry and cannot be generalised with reasonable certainty for an industry. |                                                                |                 |

## A.2. Environmental indicators

| Indicator ID                                                                                                                                                                                              | Indicator Name           | Measured impact |
|-----------------------------------------------------------------------------------------------------------------------------------------------------------------------------------------------------------|--------------------------|-----------------|
| G4-EN2                                                                                                                                                                                                    | Recycled input materials | Materials       |
| <b>Indicator not generalisable:</b><br>The portion of recycled input material used varies between different organisations in an industry and cannot be generalised with certainty for an entire industry. |                          |                 |

| Indicator ID                                                                                                                                                                                                       | Indicator Name   | Measured impact |
|--------------------------------------------------------------------------------------------------------------------------------------------------------------------------------------------------------------------|------------------|-----------------|
| G4-EN5                                                                                                                                                                                                             | Energy intensity | Energy          |
| <b>Indicator excessive:</b><br>This indicator will not be used as it only presents the information presented by G4-EN3 and G4-EN4 in a different form and is therefore deemed excessive for the present framework. |                  |                 |

13

| Indicator ID                                                                                                                                                                                                                                                                                                                                                       | Indicator Name    | Measured impact |
|--------------------------------------------------------------------------------------------------------------------------------------------------------------------------------------------------------------------------------------------------------------------------------------------------------------------------------------------------------------------|-------------------|-----------------|
| G4-EN6                                                                                                                                                                                                                                                                                                                                                             | Energy reductions | Energy          |
| <p><i>Indicator not generalisable:</i><br/>Reduction in energy use is dependent on specific energy saving steps implemented by an organisation and can therefore not be generalised for an industry.</p> <p><i>Indicator not applicable to a new industry:</i><br/>Reduction in energy use cannot be calculated for an industry that is yet to be established.</p> |                   |                 |

14

| Indicator ID                                                                                                                                                                                                                                                                                                                                                                                                         | Indicator Name                             | Measured impact |
|----------------------------------------------------------------------------------------------------------------------------------------------------------------------------------------------------------------------------------------------------------------------------------------------------------------------------------------------------------------------------------------------------------------------|--------------------------------------------|-----------------|
| G4-EN7                                                                                                                                                                                                                                                                                                                                                                                                               | Energy reductions in products and services | Energy          |
| <p><i>Indicator not generalisable:</i><br/>Reduction in energy use by products and services is dependent on specific energy saving steps implemented by an organisation and can therefore not be generalised for an industry.</p> <p><i>Indicator not applicable to a new industry:</i><br/>Reduction in energy use by products and services cannot be calculated for an industry that is yet to be established.</p> |                                            |                 |

15

| Indicator ID                                                                                                                                                                                    | Indicator Name                        | Measured impact |
|-------------------------------------------------------------------------------------------------------------------------------------------------------------------------------------------------|---------------------------------------|-----------------|
| G4-EN9                                                                                                                                                                                          | Water sources affected by withdrawals | Water           |
| <p><i>Indicator not generalisable:</i><br/>Specific water sources affected by operations of different organisations will differ and cannot be assumed to be similar throughout an industry.</p> |                                       |                 |

16

| Indicator ID                                                                                                                                                                                       | Indicator Name            | Measured impact |
|----------------------------------------------------------------------------------------------------------------------------------------------------------------------------------------------------|---------------------------|-----------------|
| G4-EN10                                                                                                                                                                                            | Water recycled and reused | Water           |
| <p><i>Indicator not generalisable:</i><br/>The amount of water recycled and reused by different organisations will differ and this indicator can therefore not be generalised for an industry.</p> |                           |                 |

17

| Indicator ID                                                                                                                                                              | Indicator Name                                   | Measured impact |
|---------------------------------------------------------------------------------------------------------------------------------------------------------------------------|--------------------------------------------------|-----------------|
| G4-EN11                                                                                                                                                                   | Facilities in or near areas of high biodiversity | Biodiversity    |
| <p><i>Indicator not generalisable:</i><br/>The location of facilities is organisation specific and can therefore not be assumed to be similar throughout an industry.</p> |                                                  |                 |

18

| Indicator ID                               | Indicator Name          | Measured impact |
|--------------------------------------------|-------------------------|-----------------|
| G4-EN12                                    | Impacts on biodiversity | Biodiversity    |
| <p><i>Indicator not generalisable:</i></p> |                         |                 |

The organisation-dependent size, location and management of operations will influence the impact on biodiversity and this indicator can therefore not be generalised for an industry.

19

| Indicator ID | Indicator Name                 | Measured impact |
|--------------|--------------------------------|-----------------|
| G4-EN13      | Habitats protected or restored | Biodiversity    |

*Indicator not generalisable:*

The organisation-dependent size, location and management of operations will influence the protection and restoration of habitat and this indicator can therefore not be generalised for an industry.

20

| Indicator ID | Indicator Name        | Measured impact |
|--------------|-----------------------|-----------------|
| G4-EN14      | IUCN Red List species | Biodiversity    |

*Indicator not generalisable:*

Red list species affected depends on location of operations and cannot be generalised for an entire industry.

21

| Indicator ID | Indicator Name                  | Measured impact |
|--------------|---------------------------------|-----------------|
| G4-MM1       | Land disturbed or rehabilitated | Biodiversity    |

*Indicator not generalisable:*

The typical size of land required for conventional production processes used to produce a specific product can be approximated to some extent, but the specific design of operations and utilities will differ between organisations. Due to the inherent uncertainty regarding the typical amount of land used, this indicator will not be included in the present framework. Note that this indicator also requires the amount of newly disturbed land and rehabilitation of land, which cannot be generalised for an industry.

22

| Indicator ID | Indicator Name          | Measured impact |
|--------------|-------------------------|-----------------|
| G4-MM2       | Biodiversity management | Biodiversity    |

*Indicator not generalisable:*

Requirements for biodiversity management is dependent on the location, size and management of operations and can therefore not be generalised for an industry.

23

| Indicator ID | Indicator Name                                    | Measured impact     |
|--------------|---------------------------------------------------|---------------------|
| G4-MM3       | Amounts of overburden, rock, tailings and sludges | Effluents and waste |

*Indicator excessive:*

This indicator will not be used, as this framework specifically aims to evaluate the sustainability implications of beneficiating a metal by manufacturing a specific product and comparing these implications to that of other products that can be manufactured with the metal. The source of the metal is therefore assumed to be similar for all the products, implying that theoretically the amount of mining and mineral processing waste generated to produce that metal is the same or similar for all products that can be manufactured with the metal and it is therefore not sensible to include this indicator in the present framework. Note that the material use (including the amount of metal used) is captured in indicator EN1.

24

25

| Indicator ID                                                                                                                                                                                                                                                                                                                                                           | Indicator Name                 | Measured impact |
|------------------------------------------------------------------------------------------------------------------------------------------------------------------------------------------------------------------------------------------------------------------------------------------------------------------------------------------------------------------------|--------------------------------|-----------------|
| G4-EN16                                                                                                                                                                                                                                                                                                                                                                | <b>GHG emissions (Scope 2)</b> | Emissions       |
| <p><i>Indicator not generalisable:</i><br/>Indirect greenhouse gas emissions will differ for different organisations, as each organisation will have a unique distribution of own generation and purchased energy. Indirect emissions is therefore not generalisable, but will be included in indicator G4-EN15 (as explained in the scope statement for G4-EN15).</p> |                                |                 |

26

| Indicator ID                                                                                                                                                                                                                 | Indicator Name                 | Measured impact |
|------------------------------------------------------------------------------------------------------------------------------------------------------------------------------------------------------------------------------|--------------------------------|-----------------|
| G4-EN18                                                                                                                                                                                                                      | <b>GHG emissions intensity</b> | Emissions       |
| <p><i>Indicator excessive:</i><br/>This indicator will not be used as it only presents the information presented by G4-EN15 and G4-EN17 in a different form and is therefore deemed excessive for the present framework.</p> |                                |                 |

27

| Indicator ID                                                                                                                                                                                                                                                                                                                                                                                                                                                   | Indicator Name                    | Measured impact |
|----------------------------------------------------------------------------------------------------------------------------------------------------------------------------------------------------------------------------------------------------------------------------------------------------------------------------------------------------------------------------------------------------------------------------------------------------------------|-----------------------------------|-----------------|
| G4-EN19                                                                                                                                                                                                                                                                                                                                                                                                                                                        | <b>Reduction of GHG emissions</b> | Emissions       |
| <p><i>Indicator not generalisable:</i><br/>Reductions in greenhouse gas emissions due to organisation-specific initiatives to reduce emissions cannot be generalised for an industry as different organisations implement different initiatives resulting in different reductions.</p> <p><i>Indicator not applicable to a new industry:</i><br/>Reduction in greenhouse gas emissions cannot be calculated for an industry that is yet to be established.</p> |                                   |                 |

28

| Indicator ID                                                                                                                                                                                                                                                                                                                                                     | Indicator Name            | Measured impact   |
|------------------------------------------------------------------------------------------------------------------------------------------------------------------------------------------------------------------------------------------------------------------------------------------------------------------------------------------------------------------|---------------------------|-------------------|
| G4-EN24                                                                                                                                                                                                                                                                                                                                                          | <b>Significant spills</b> | Effluents & waste |
| <p><i>Indicator not generalisable:</i><br/>Spills are organisation specific and depend on management of individual operations. This indicator can therefore not be generalised with reasonable certainty for an industry.</p> <p><i>Indicator not applicable to a new industry:</i><br/>Spills cannot be used for an industry that is yet to be established.</p> |                           |                   |

29

| Indicator ID                                                                                                                                                                                                                                                                                                                       | Indicator Name         | Measured impact   |
|------------------------------------------------------------------------------------------------------------------------------------------------------------------------------------------------------------------------------------------------------------------------------------------------------------------------------------|------------------------|-------------------|
| G4-EN25                                                                                                                                                                                                                                                                                                                            | <b>Hazardous waste</b> | Effluents & waste |
| <p><i>Indicator not generalisable:</i><br/>The mass of hazardous waste generated is included in EN23, above. This indicator specifically refers to the transport, import, export and treatment of hazardous waste. These actions will be organisation-specific and cannot be generalised for all organisations in an industry.</p> |                        |                   |

30

| Indicator ID                               | Indicator Name                         | Measured impact   |
|--------------------------------------------|----------------------------------------|-------------------|
| G4-EN26                                    | <b>Biodiversity affected by runoff</b> | Effluents & waste |
| <p><i>Indicator not generalisable:</i></p> |                                        |                   |

Habitats affected by run-off is dependent on the location, nature and waste management of individual operations and this indicator can therefore not be generalised for an industry.

| Indicator ID                                                                                                                                                                                                                                                                                                                                                    | Indicator Name                                               | Measured impact     |
|-----------------------------------------------------------------------------------------------------------------------------------------------------------------------------------------------------------------------------------------------------------------------------------------------------------------------------------------------------------------|--------------------------------------------------------------|---------------------|
| G4-EN27                                                                                                                                                                                                                                                                                                                                                         | Mitigation of environmental impacts of products and services | Products & services |
| <p><i>Indicator not generalisable:</i><br/>Mitigation of impacts depend on organisation-specific initiatives and can therefore not be generalised for an industry.</p> <p><i>Indicator not applicable to a new industry:</i><br/>Mitigation of environmental impacts of products and services cannot be used for an industry that is yet to be established.</p> |                                                              |                     |

| Indicator ID                                                                                                                                                                                                                                                                            | Indicator Name                  | Measured impact |
|-----------------------------------------------------------------------------------------------------------------------------------------------------------------------------------------------------------------------------------------------------------------------------------------|---------------------------------|-----------------|
| G4-EN29                                                                                                                                                                                                                                                                                 | Environmental fines & sanctions | Compliance      |
| <p><i>Indicator not generalisable:</i><br/>Fines and sanctions are organisation-specific and cannot be generalised for an industry.</p> <p><i>Indicator not applicable to a new industry:</i><br/>Fines and sanctions cannot be used for an industry that is yet to be established.</p> |                                 |                 |

| Indicator ID                                                                                                                                                                                                                                      | Indicator Name                                                      | Measured impact |
|---------------------------------------------------------------------------------------------------------------------------------------------------------------------------------------------------------------------------------------------------|---------------------------------------------------------------------|-----------------|
| G4-EN30                                                                                                                                                                                                                                           | Environmental impacts from product distribution and employee travel | Transport       |
| <p><i>Indicator not generalisable:</i><br/>Material, product and employee transport is highly dependent on the location of operations and the management of an organisation. This indicator can therefore not be generalised for an industry.</p> |                                                                     |                 |

| Indicator ID                                                                                                                                            | Indicator Name            | Measured impact           |
|---------------------------------------------------------------------------------------------------------------------------------------------------------|---------------------------|---------------------------|
| G4-EN31                                                                                                                                                 | Environmental investments | Environmental investments |
| <p><i>Indicator not generalisable:</i><br/>Environmental protection expenditure is organisation-specific and cannot be generalised for an industry.</p> |                           |                           |

| Indicator ID                                                                                                                                              | Indicator Name                                      | Measured impact        |
|-----------------------------------------------------------------------------------------------------------------------------------------------------------|-----------------------------------------------------|------------------------|
| G4-EN32                                                                                                                                                   | New suppliers screened using environmental criteria | Supplier environmental |
| <p><i>Indicator not generalisable:</i><br/>Contracting and screening of suppliers is organisation-specific and cannot be generalised for an industry.</p> |                                                     |                        |

| Indicator ID | Indicator Name                  | Measured impact                    |
|--------------|---------------------------------|------------------------------------|
| G4-EN34      | <b>Environmental grievances</b> | Environmental grievance mechanisms |

**Indicator not generalisable:**

Grievances result from organisation-specific action or lack of action and can therefore not be generalised for an industry.

**Indicator not applicable to a new industry:**

Grievances cannot be used for an industry that is yet to be established.

## A.3. Social indicators

| Indicator ID | Indicator Name                                  | Measured impact |
|--------------|-------------------------------------------------|-----------------|
| G4-LA2       | <b>Benefits provided to full-time employees</b> | Employment      |

**Indicator not generalisable:**

Benefits provided to full-time employees that are not provided to temporary or part-time employees cannot be generalised for an entire sector (similar to G4-EC3).

| Indicator ID | Indicator Name                                                 | Measured impact |
|--------------|----------------------------------------------------------------|-----------------|
| G4-LA3       | <b>Return to work and retention rates after parental leave</b> | Employment      |

**Indicator not generalisable:**

Retention rates after parental leave depends on the organisation-specific work environment and can therefore not be generalised for an industry.

| Indicator ID | Indicator Name                                      | Measured impact             |
|--------------|-----------------------------------------------------|-----------------------------|
| G4-LA4       | <b>Notice periods regarding operational changes</b> | Labour/Management relations |

**Indicator not generalisable:**

Notice periods regarding operational changes depend on specific organisation policy and cannot be generalised for an industry.

| Indicator ID | Indicator Name                                      | Measured impact             |
|--------------|-----------------------------------------------------|-----------------------------|
| G4-MM4       | <b>Notice periods regarding operational changes</b> | Labour/Management relations |

**Indicator not generalisable:**

The number of strikes and lock-outs are dependent on organisation-specific factors and cannot be generalised for an industry.

**Indicator not applicable to a new industry:**

Strikes and lock-outs cannot have taken place if the industry is yet to be established and this indicator is therefore not applicable for the present project.

| Indicator ID | Indicator Name                                        | Measured impact              |
|--------------|-------------------------------------------------------|------------------------------|
| G4-LA5       | Workforce represented in health and safety committees | Occupational health & safety |

**Indicator not generalisable:**

Workforce representation in health and safety committees will differ for different organisations and cannot be generalised for an industry.

46

| Indicator ID | Indicator Name                                  | Measured impact              |
|--------------|-------------------------------------------------|------------------------------|
| G4-LA7       | Workers with high incidence of risk of diseases | Occupational health & safety |

**Indicator excessive:**

This indicator aims to reflect whether there are workers who are involved in occupational activities who have a high incidence or high risk of specific diseases. This information is already captured in the occupational disease rate in indicator G4-LA6. Further, this indicator is qualitative, with no specific rate that is reported. Quantification and summation with G4-LA6 is therefore problematic and subsequently this indicator is not included in the present framework.

47

| Indicator ID | Indicator Name                                                 | Measured impact              |
|--------------|----------------------------------------------------------------|------------------------------|
| G4-LA8       | Health & safety topics covered in agreements with trade unions | Occupational health & safety |

**Indicator not generalisable:**

Health and safety agreements with trade unions are organisation-specific and cannot be generalised with certainty for an entire industry.

48

| Indicator ID | Indicator Name                                         | Measured impact      |
|--------------|--------------------------------------------------------|----------------------|
| G4-LA10      | Programs for skills management managing career endings | Training & education |

**Indicator not generalisable:**

Skills management programs depend on organisation-specific policy and cannot be generalised for an industry consisting of different organisations.

49

| Indicator ID | Indicator Name                                                 | Measured impact      |
|--------------|----------------------------------------------------------------|----------------------|
| G4-LA11      | Employees receiving performance and career development reviews | Training & education |

**Indicator not generalisable:**

Employee performance and career reviews depend on organisation-specific policy regarding employee development and may differ substantially between organisations in a specific industry, therefore making accurate generalisation impossible.

50

51

| Indicator ID | Indicator Name                                 | Measured impact |
|--------------|------------------------------------------------|-----------------|
| G4-LA12      | Composition of governance bodies and employees | Diversity       |

**Indicator not generalisable:**

Diversity of governance bodies and employees within an industry depend on the diversity of the organisations the industry is composed of and the diversity of the industry can therefore not be generalised with certainty without an assessment of the individual organisations.

52

| Indicator ID | Indicator Name                                       | Measured impact           |
|--------------|------------------------------------------------------|---------------------------|
| G4-LA13      | Ratio of basic salary & remuneration of women to men | Equal pay for women & men |

**Indicator not generalisable:**

The ratio of basic salary and remuneration of women to men depend on organisation-specific efforts to ensure equal payment for work of equal value. This indicator can therefore not be sensibly generalised for an entire industry.

53

| Indicator ID | Indicator Name                                                   | Measured impact                          |
|--------------|------------------------------------------------------------------|------------------------------------------|
| G4-LA14      | New suppliers that were screened using labour practices criteria | Supplier assessment for labour practices |

**Indicator not generalisable:**

Contracting and screening of suppliers is organisation-specific and cannot be generalised for an industry.

54

| Indicator ID | Indicator Name                    | Measured impact                        |
|--------------|-----------------------------------|----------------------------------------|
| G4-LA16      | Grievances about labour practices | Labour practices grievances mechanisms |

**Indicator not generalisable:**

Grievances result from organisation-specific action or lack of action and can therefore not be generalised for an industry.

**Indicator not applicable to a new industry:**

Grievances cannot be used for an industry that is yet to be established.

55

| Indicator ID | Indicator Name                                                                                | Measured impact          |
|--------------|-----------------------------------------------------------------------------------------------|--------------------------|
| G4-HR1       | Investment agreements and contracts that include human rights clauses and underwent screening | Human rights investments |

**Indicator not generalisable:**

Investment agreements and its inclusions are organisation-specific and cannot be generalised for an industry.

56

57

| Indicator ID | Indicator Name                    | Measured impact          |
|--------------|-----------------------------------|--------------------------|
| G4-HR2       | Employee training on human rights | Human rights investments |

**Indicator not generalisable:**

Time spent on employee training on human rights is dependent on organisation-specific policy and can therefore not be generalised for an industry, unless specific regulations enforce specific human rights training requirements.

58

| Indicator ID | Indicator Name                                                         | Measured impact    |
|--------------|------------------------------------------------------------------------|--------------------|
| G4-HR7       | Security personnel trained in the organisation's human rights policies | Security practices |

**Indicator not generalisable:**

Training of security personnel in human rights is dependent on organisation-specific policy and can therefore not be generalised for an industry.

59

| Indicator ID | Indicator Name                                                 | Measured impact   |
|--------------|----------------------------------------------------------------|-------------------|
| G4-HR8       | Incidents of violations involving rights of indigenous peoples | Indigenous rights |

**Indicator not generalisable:**

Incidents of violation involving rights of indigenous peoples depend on the location, nature and size of operations and organisation policy. This indicator can therefore not be generalised for an industry.

**Indicator not applicable to a new industry:**

Incidents of violation of rights of indigenous people cannot have taken place if an industry is yet to be established and this indicator can therefore not be used in the framework.

60

| Indicator ID | Indicator Name                                                | Measured impact          |
|--------------|---------------------------------------------------------------|--------------------------|
| G4-HR9       | Operations that have been subject to human rights assessments | Human rights assessments |

**Indicator excessive:**

In the GRI G4 framework, this indicator seeks to reflect the extent to which an organization takes human rights considerations into account in its decision-making. This cannot be reported in the present framework, due to its prospective nature. This indicator will therefore have to be modified to reflect the perceived risk of human rights violations, however, this information is already captured in the modified indicators G4-LA15, G4-HR3, G4-HR4, G4-HR5 and G4-HR6. This indicator is therefore excluded from this framework.

61

| Indicator ID | Indicator Name                                                            | Measured impact   |
|--------------|---------------------------------------------------------------------------|-------------------|
| G4-MM5       | Operations taking place in or adjacent to indigenous peoples' territories | Indigenous rights |

**Indicator not generalisable:**

The number of operations taking place in or adjacent to indigenous peoples' territories cannot be generalised for an industry as the location of operations differ according to the organisations of which the industry is composed.

**Indicator not applicable to a new industry:**

The location of operations cannot be used as the industry and its operations is not yet established.

62

| Indicator ID                                                                                                                                      | Indicator Name                          | Measured impact                  |
|---------------------------------------------------------------------------------------------------------------------------------------------------|-----------------------------------------|----------------------------------|
| G4-HR10                                                                                                                                           | New suppliers screened for human rights | Supplier human rights assessment |
| <i>Indicator not generalisable:</i><br>Contracting and screening of suppliers is organisation-specific and cannot be generalised for an industry. |                                         |                                  |

63

| Indicator ID                                                                                                                                                       | Indicator Name                | Measured impact                    |
|--------------------------------------------------------------------------------------------------------------------------------------------------------------------|-------------------------------|------------------------------------|
| G4-HR12                                                                                                                                                            | Grievances about human rights | Human rights grievances mechanisms |
| <i>Indicator not generalisable:</i><br>Grievances result from organisation-specific action or lack of action and can therefore not be generalised for an industry. |                               |                                    |
| <i>Indicator not applicable to a new industry:</i><br>Grievances cannot be used for an industry that is yet to be established.                                     |                               |                                    |

64

| Indicator ID                                                                                                                                                                                                                                                                                                        | Indicator Name                                                          | Measured impact   |
|---------------------------------------------------------------------------------------------------------------------------------------------------------------------------------------------------------------------------------------------------------------------------------------------------------------------|-------------------------------------------------------------------------|-------------------|
| G4-SO1                                                                                                                                                                                                                                                                                                              | Local community engagement, impact assessments and development programs | Local communities |
| <i>Indicator not generalisable:</i><br>Implementation of local community engagement, impact assessments and development programs are dependent on organisation-specific policy and strategy and cannot be generalised for an industry consisting of different organisations with different policies and strategies. |                                                                         |                   |

65

| Indicator ID                                                                                                                                                                                                                                                   | Indicator Name                                                                              | Measured impact   |
|----------------------------------------------------------------------------------------------------------------------------------------------------------------------------------------------------------------------------------------------------------------|---------------------------------------------------------------------------------------------|-------------------|
| G4-MM6                                                                                                                                                                                                                                                         | Disputes relating to land use, customary rights of local communities and indigenous peoples | Local communities |
| <i>Indicator not generalisable:</i><br>Disputes relating to land use, customary rights of local communities and indigenous peoples are dependent on the location, size and nature of operations and are therefore organisation-specific and not generalisable. |                                                                                             |                   |

66

| Indicator ID                                                                                                                                                       | Indicator Name                                | Measured impact   |
|--------------------------------------------------------------------------------------------------------------------------------------------------------------------|-----------------------------------------------|-------------------|
| G4-MM7                                                                                                                                                             | Grievance mechanisms used to resolve disputes | Local communities |
| <i>Indicator not generalisable:</i><br>Grievances result from organisation-specific action or lack of action and can therefore not be generalised for an industry. |                                               |                   |
| <i>Indicator not applicable to a new industry:</i><br>Grievances cannot be used for an industry that is yet to be established.                                     |                                               |                   |

67

68

| Indicator ID | Indicator Name                                         | Measured impact |
|--------------|--------------------------------------------------------|-----------------|
| G4-SO4       | <b>Communications &amp; training on anticorruption</b> | Anti-corruption |

**Indicator not generalisable:**

Communications and training on anti-corruption is organisation-specific and cannot be generalised for an industry.

69

| Indicator ID | Indicator Name                           | Measured impact |
|--------------|------------------------------------------|-----------------|
| G4-SO5       | <b>Confirmed incidents of corruption</b> | Anti-corruption |

**Indicator not generalisable:**

Incidents of corruption are inherently organisation-specific and can therefore not be generalised for an industry. Risk of corruption is captured in SO3.

**Indicator not applicable to a new industry:**

Incidents of corruption cannot have taken place if an industry is yet to be established and this indicator can therefore not be used in the framework.

70

| Indicator ID | Indicator Name                 | Measured impact |
|--------------|--------------------------------|-----------------|
| G4-SO6       | <b>Political contributions</b> | Public policy   |

**Indicator not generalisable:**

Political contributions made by organisations depend on organisation-specific political affiliations and cannot be generalised for an industry.

71

| Indicator ID | Indicator Name                    | Measured impact            |
|--------------|-----------------------------------|----------------------------|
| G4-SO7       | <b>Anti-competitive behaviour</b> | Anti-competitive behaviour |

**Indicator not generalisable:**

Legal action regarding anti-competitive behaviour result from organisation-specific action or lack of action and can therefore not be generalised.

**Indicator not applicable to a new industry:**

Anti-competitive behaviour, anti-trust and monopoly practices, and the subsequent legal action, cannot have taken place an industry that is yet to be established.

72

| Indicator ID | Indicator Name                            | Measured impact |
|--------------|-------------------------------------------|-----------------|
| G4-SO8       | <b>Fines for non-compliance with laws</b> | Compliance      |

**Indicator not generalisable:**

Fines and sanctions are organisation-specific and cannot be generalised for an industry.

**Indicator not applicable to a new industry:**

Fines and sanctions cannot be used for an industry that is yet to be established.

73

| Indicator ID | Indicator Name                                       | Measured impact                            |
|--------------|------------------------------------------------------|--------------------------------------------|
| G4-SO9       | <b>New suppliers screened for impacts on society</b> | Supplier assessment for impacts on society |

**Indicator not generalisable:**

Contracting and screening of suppliers is organisation-specific and cannot be generalised for an industry.

74

| Indicator ID                                                                                                                                                                                                                                                                                                      | Indicator Name                             | Measured impact                             |
|-------------------------------------------------------------------------------------------------------------------------------------------------------------------------------------------------------------------------------------------------------------------------------------------------------------------|--------------------------------------------|---------------------------------------------|
| G4-SO11                                                                                                                                                                                                                                                                                                           | <b>Grievances about impacts on society</b> | Grievance mechanisms for impacts on society |
| <p><i>Indicator not generalisable:</i><br/>Grievances result from organisation-specific action or lack of action and can therefore not be generalised for an industry.</p> <p><i>Indicator not applicable to a new industry:</i><br/>Grievances cannot be used for an industry that is yet to be established.</p> |                                            |                                             |

75

| Indicator ID                                                                                                                                                                                                                                                                | Indicator Name                                                                             | Measured impact                |
|-----------------------------------------------------------------------------------------------------------------------------------------------------------------------------------------------------------------------------------------------------------------------------|--------------------------------------------------------------------------------------------|--------------------------------|
| G4-MM8                                                                                                                                                                                                                                                                      | <b>Operating sites where artisanal or small-scale mining takes place on or adjacent to</b> | Artisanal & small-scale mining |
| <p><i>Indicator not generalisable:</i><br/>Operating sites close to artisanal or small-scale mining and the risks related to this proximity are dependent on the location, size and nature of operations and are therefore organisation-specific and not generalisable.</p> |                                                                                            |                                |

76

| Indicator ID                                                                                                                                                                                                                                                                   | Indicator Name                              | Measured impact |
|--------------------------------------------------------------------------------------------------------------------------------------------------------------------------------------------------------------------------------------------------------------------------------|---------------------------------------------|-----------------|
| G4-MM9                                                                                                                                                                                                                                                                         | <b>Sites where resettlements took place</b> | Resettlement    |
| <p><i>Indicator not generalisable:</i><br/>Sites where resettlements took place and the impacts the resettlement had on the livelihoods of the affected parties are dependent on the location of operations and are therefore organisation-specific and not generalisable.</p> |                                             |                 |

77

| Indicator ID                                                                                                                                                                                                | Indicator Name                       | Measured impact  |
|-------------------------------------------------------------------------------------------------------------------------------------------------------------------------------------------------------------|--------------------------------------|------------------|
| G4-MM10                                                                                                                                                                                                     | <b>Operations with closure plans</b> | Closure planning |
| <p><i>Indicator not generalisable:</i><br/>Whether closure plans are in place for operations depend on organisation-specific strategy, policy and initiative and cannot be generalised for an industry.</p> |                                      |                  |

78

| Indicator ID                                                                                                                                                                                                                                                                                                                                                                                                                                                                                                    | Indicator Name                                                                              | Measured impact          |
|-----------------------------------------------------------------------------------------------------------------------------------------------------------------------------------------------------------------------------------------------------------------------------------------------------------------------------------------------------------------------------------------------------------------------------------------------------------------------------------------------------------------|---------------------------------------------------------------------------------------------|--------------------------|
| G4-PR2                                                                                                                                                                                                                                                                                                                                                                                                                                                                                                          | <b>Non-compliance concerning the health &amp; safety impacts of products &amp; services</b> | Customer health & safety |
| <p><i>Indicator not generalisable:</i><br/>Incidents of non-compliance with regulations result from inadequate internal management systems and procedures, or ineffective implementation. This indicator is therefore organisation-specific and not generalisable for an industry.</p> <p><i>Indicator not applicable to a new industry:</i><br/>Incidents of non-compliance with regulations cannot have taken place if an industry is yet to be established and this indicator can therefore not be used.</p> |                                                                                             |                          |

79

80

| Indicator ID | Indicator Name                                                  | Measured impact             |
|--------------|-----------------------------------------------------------------|-----------------------------|
| G4-PR3       | <b>Product &amp; service information required for labelling</b> | Product & service labelling |

**Indicator not generalisable:**

Product and service information and labelling is based on organisation-specific policy, but may be enforced by regulations for specific industries and can only in such cases be generalised for an industry.

81

| Indicator ID | Indicator Name                                                                    | Measured impact             |
|--------------|-----------------------------------------------------------------------------------|-----------------------------|
| G4-PR4       | <b>Non-compliance with regulations concerning product &amp; service labelling</b> | Product & service labelling |

**Indicator not generalisable:**

Non-compliance with regulations results from inadequate internal management systems and procedures and is organisation-specific and is therefore not generalisable.

**Indicator not applicable to a new industry:**

Incidents of non-compliance with regulations cannot have taken place if an industry is yet to be established and this indicator can therefore not be used.

82

| Indicator ID | Indicator Name                                 | Measured impact             |
|--------------|------------------------------------------------|-----------------------------|
| G4-PR5       | <b>Surveys measuring customer satisfaction</b> | Product & service labelling |

**Indicator not generalisable:**

Customer satisfaction surveys are conducted by some organisations only and depend on the relationship between the specific organisation and its stakeholders. This indicator can therefore not be generalised sensibly for an industry.

83

| Indicator ID | Indicator Name                                                             | Measured impact            |
|--------------|----------------------------------------------------------------------------|----------------------------|
| G4-PR7       | <b>Non-compliance with regulations concerning marketing communications</b> | Marketing & communications |

**Indicator not generalisable:**

Non-compliance with regulations results from inadequate internal management systems and procedures and is organisation-specific and is therefore not generalisable.

**Indicator not applicable to a new industry:**

Incidents of non-compliance with regulations cannot have taken place if an industry is yet to be established and this indicator can therefore not be used.

84

85

| Indicator ID | Indicator Name                                                              | Measured impact  |
|--------------|-----------------------------------------------------------------------------|------------------|
| G4-PR8       | Complaints regarding breaches of customer privacy & losses of customer data | Customer privacy |

***Indicator not generalisable:***

Complaints regarding breaches of customer privacy and non-compliance with regulations results from inadequate internal management systems and procedures and is organisation-specific and is therefore not generalisable.

***Indicator not applicable to a new industry:***

Complaints regarding breaches of customer privacy and losses of customer data cannot be used for an industry that is yet to be established.

86

| Indicator ID | Indicator Name                                                                    | Measured impact    |
|--------------|-----------------------------------------------------------------------------------|--------------------|
| G4-PR9       | Fines for non-compliance with laws and regulations concerning products & services | Product compliance |

***Indicator not generalisable:***

Fines and sanctions are organisation-specific and cannot be generalised for an industry.

***Indicator not applicable to a new industry:***

Fines and sanctions cannot be used for an industry that is yet to be established.

87

88
