# Supplementary material
Source: MDPI journal article supplement (https://www.mdpi.com/2071-1050/10/3/878)
Supplement: s1 [file s1]

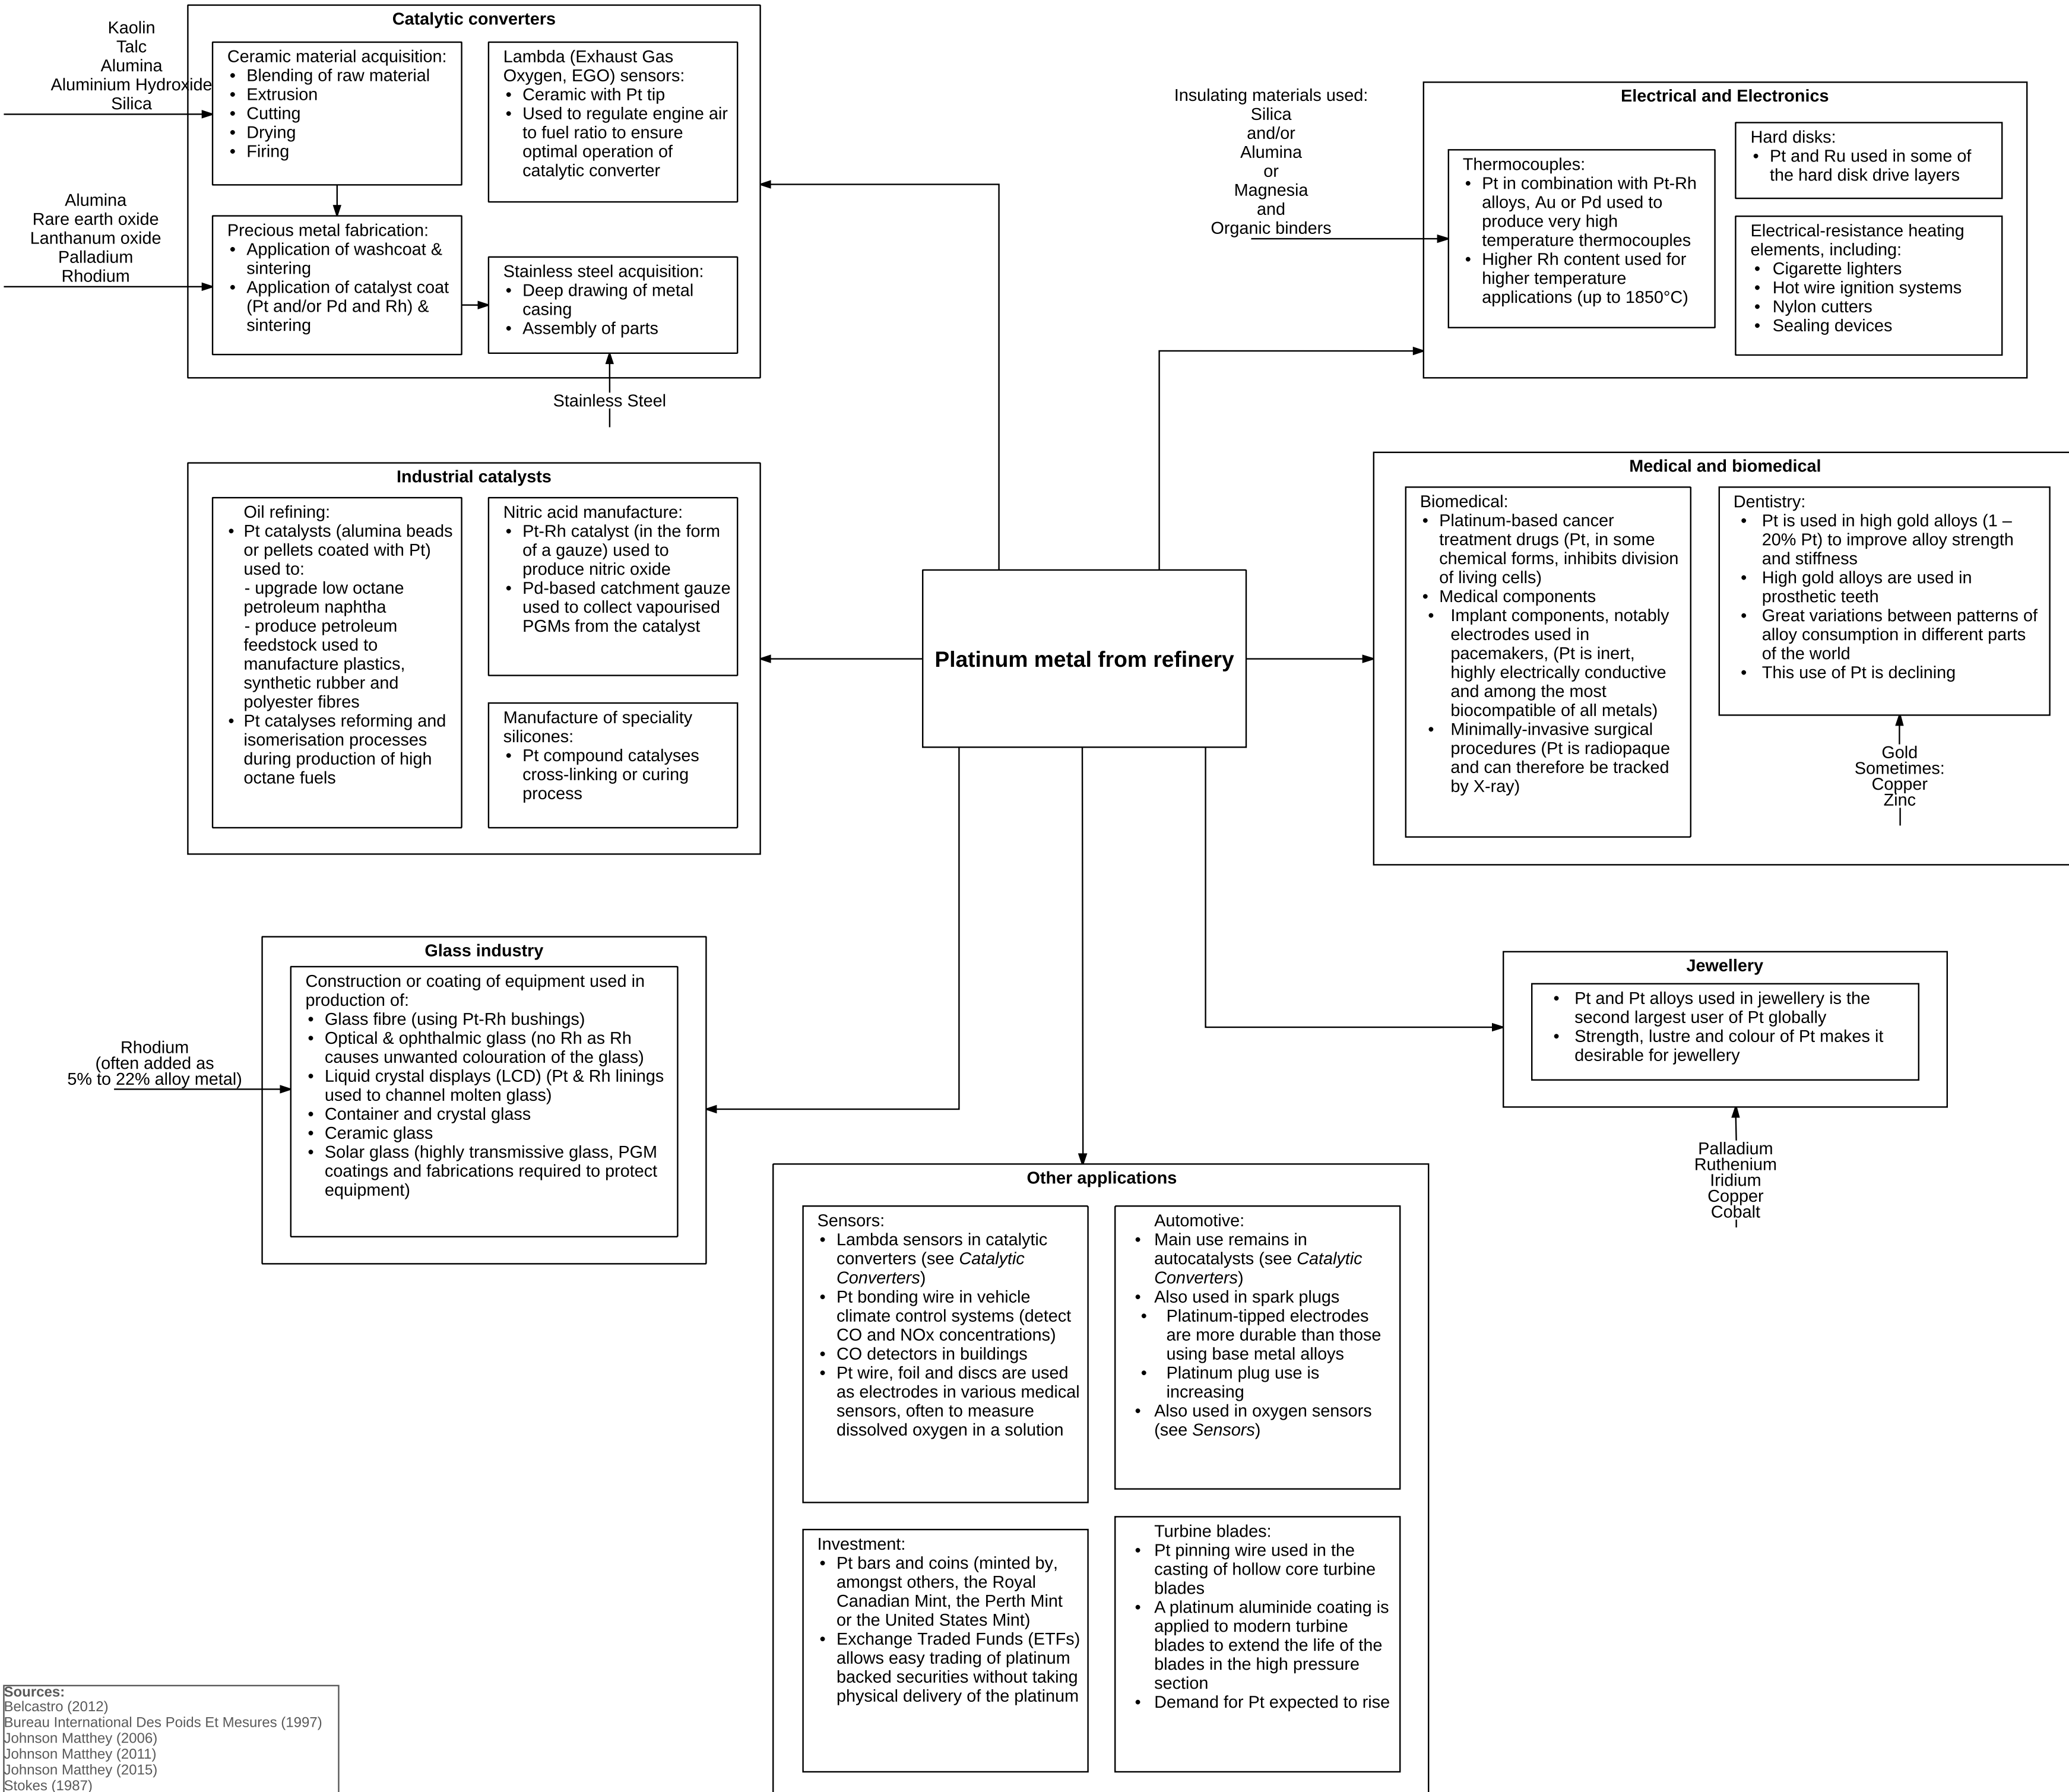

**Sources:**  
Belcastro (2012)  
Bureau International Des Poids Et Mesures (1997)  
Johnson Matthey (2006)  
Johnson Matthey (2011)  
Johnson Matthey (2015)  
Stokes (1987)  
USGS (2004)
