# Supplementary material
Source: MDPI journal article supplement (https://www.mdpi.com/2071-1050/10/3/878)
Supplement: s1 [file s1]

Archive with 12 entries (9 files):
- Supp/
- Supp/.DS_Store
- __MACOSX/
- __MACOSX/Supp/
- __MACOSX/Supp/._.DS_Store
- Supp/Platinum production.pdf
- __MACOSX/Supp/._Platinum production.pdf
- Supp/Platinum use.pdf
- __MACOSX/Supp/._Platinum use.pdf
- Supp/Supplementary File S3.pdf
- __MACOSX/Supp/._Supplementary File S3.pdf
- __MACOSX/._Supp
